# Supplementary material
Source: PubMed Central journal article supplement (PMC3710762)
Supplement: mmc1.pdf [file mmc1.pdf]

## Supplemental Data

### General Framework for Meta-analysis of Rare Variants

#### in Sequencing Association Studies

Seunggeun Lee, Tanya M. Teslovich, Michael Boehnke, and Xihong Lin

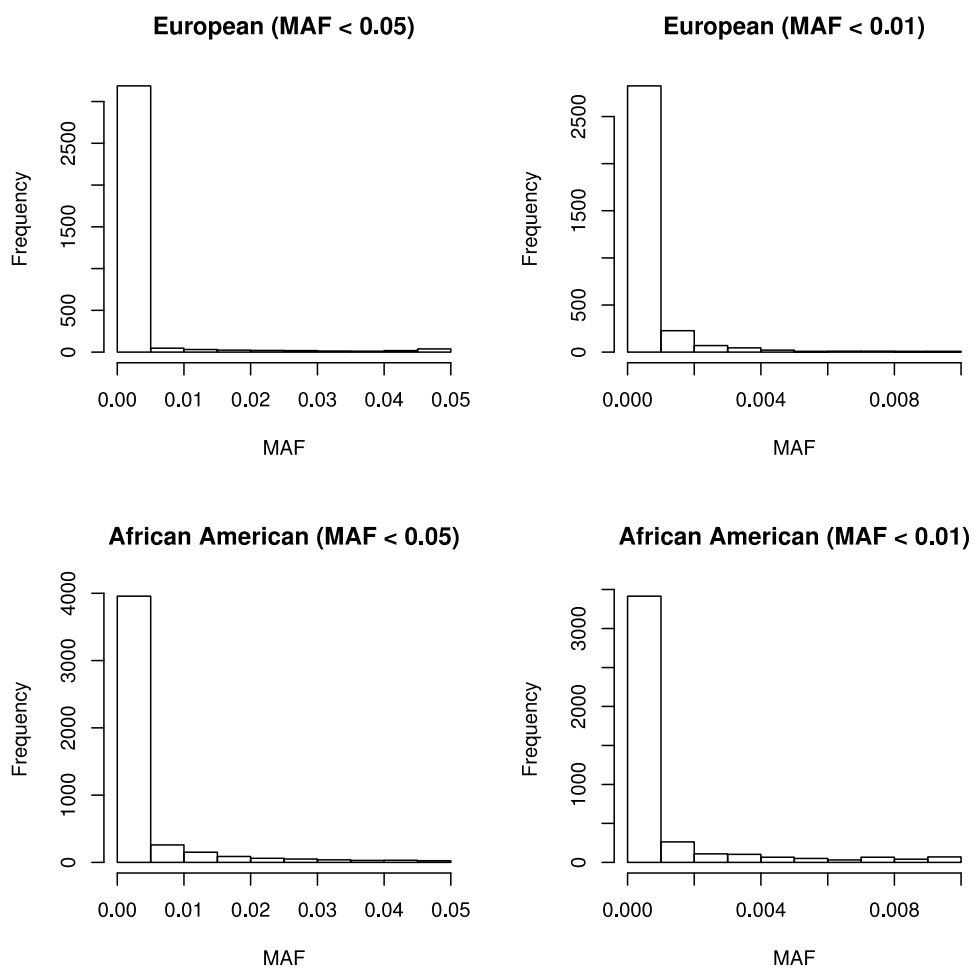

**Figure S1: Distribution of allele frequencies for simulated data**

MAFs for simulated Caucasian (top) and African American (bottom) data are based on the population allele frequencies under the coalescent model. The left panel considers  $MAF < 0.05$ , and the right panel zooms into a region  $MAF < 0.01$ .

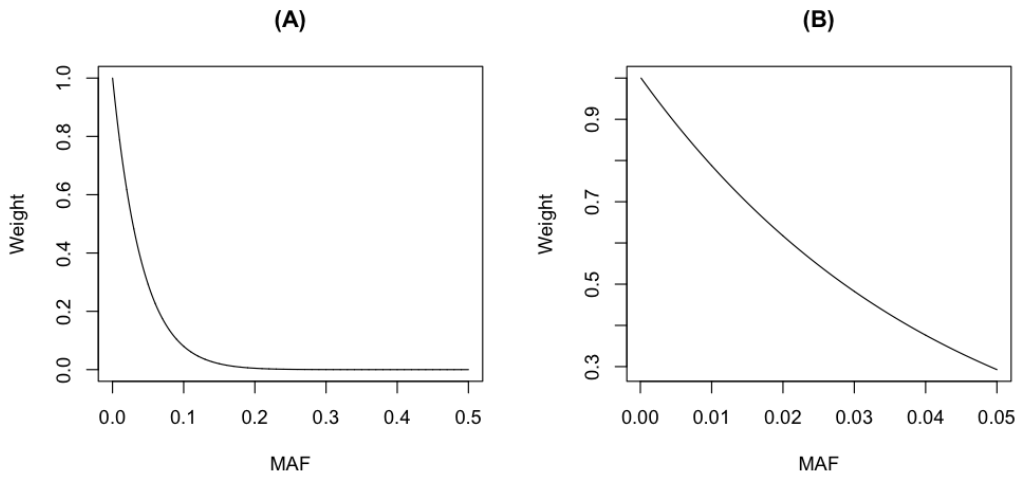

**Figure S2: Default Beta(1,25) weight function**  
 (A) and (B) represent the same functions, while (B) zooms into the region with MAF < 0.05.

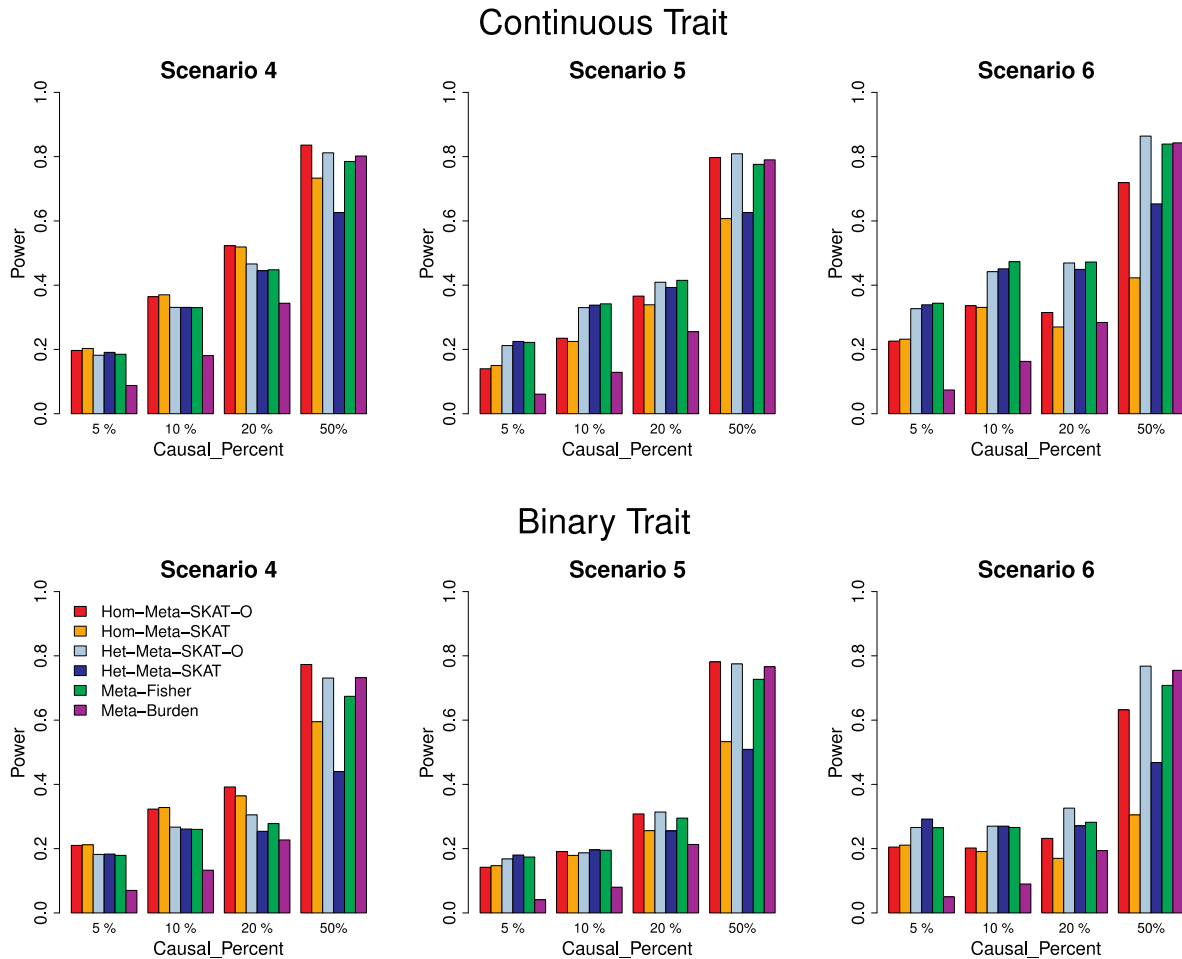

**Figure S3: Power Comparisons of the Six Competing Methods with Equal Study Cohorts' Sizes when All Causal Variants Were Risk-Increasing**

Empirical power at  $\alpha = 2.5 \times 10^{-6}$  with equal study cohort sizes (Table 1) when all causal variants in a region were risk-increasing. All the other settings are the same as those in Figure 2 and 3 (main text).

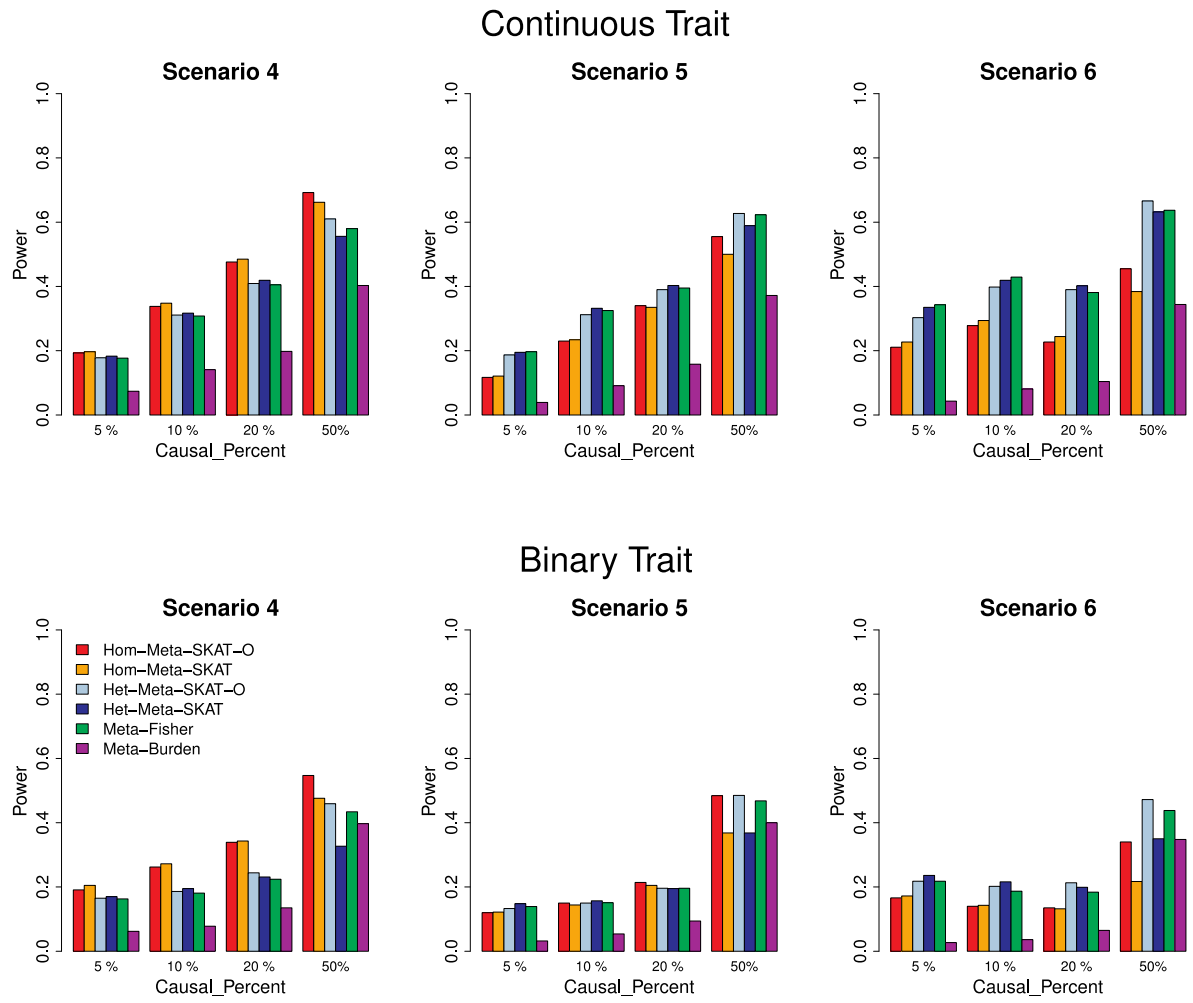

**Figure S4: Power Comparisons of the Six Competing Methods with Equal Study Cohorts' Sizes when 20%/80% of Causal Variants Were Risk-Decreasing/Risk-Increasing**

Empirical power at  $\alpha = 2.5 \times 10^{-6}$  with equal study cohort sizes (Table 1) assuming 20% of the causal variants were risk-decreasing and 80% of the causal variants were risk-increasing. All the other settings are the same as those in Figure 2 and 3 (main text).

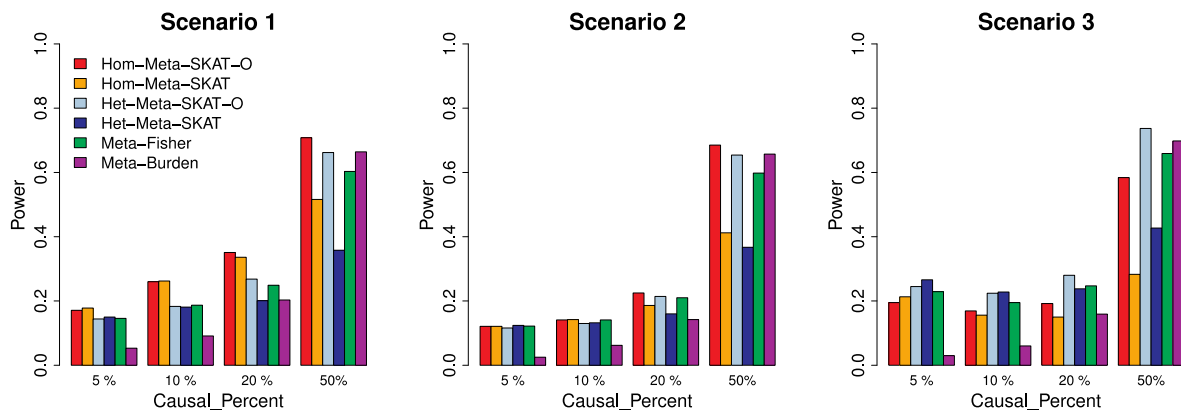

**Figure S5: Power Comparisons of the Six Competing Methods with High Disease Prevalence when All Causal Variants Were Risk-Increasing**

Empirical power from the binary trait simulations when the disease prevalence was 0.1, and all causal variants in a region were risk-increasing. The power was obtained at  $\alpha = 2.5 \times 10^{-6}$  with different study cohort sizes (Table 1). All the other settings are the same as those in Figure 2 and 3 (main text).

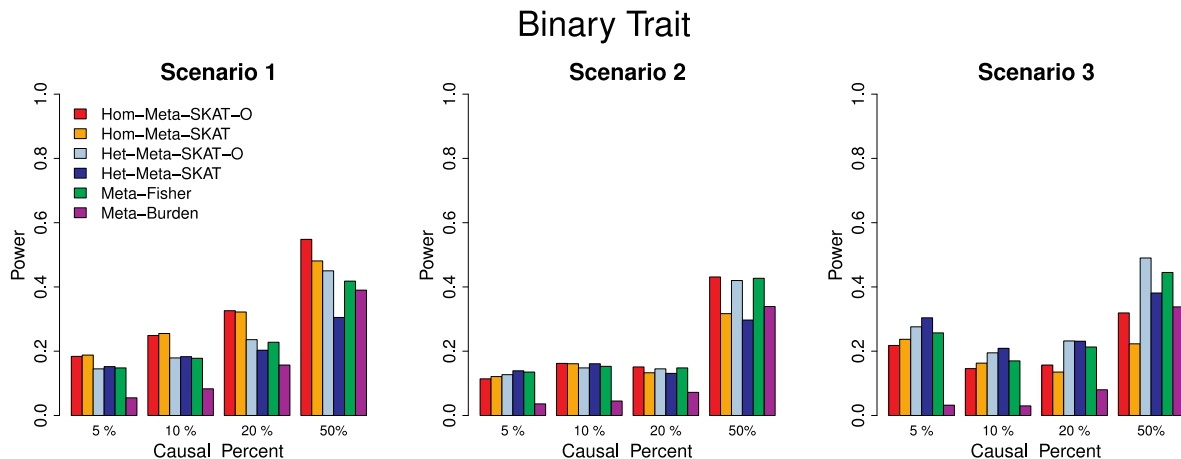

**Figure S6: Power Comparisons of the Six Competing Methods with High Disease Prevalence when 20%/80% of Causal Variants Were Risk-Decreasing/Risk-Increasing**

Empirical power from the binary trait simulations when the disease prevalence was 0.1. 20% of the causal variants were risk-decreasing, and 80% of the causal variants were risk-increasing. The power was obtained at  $\alpha = 2.5 \times 10^{-6}$  with different study cohort sizes (Table 1). All the other settings are the same as those in Figure 2 and 3 (main text).

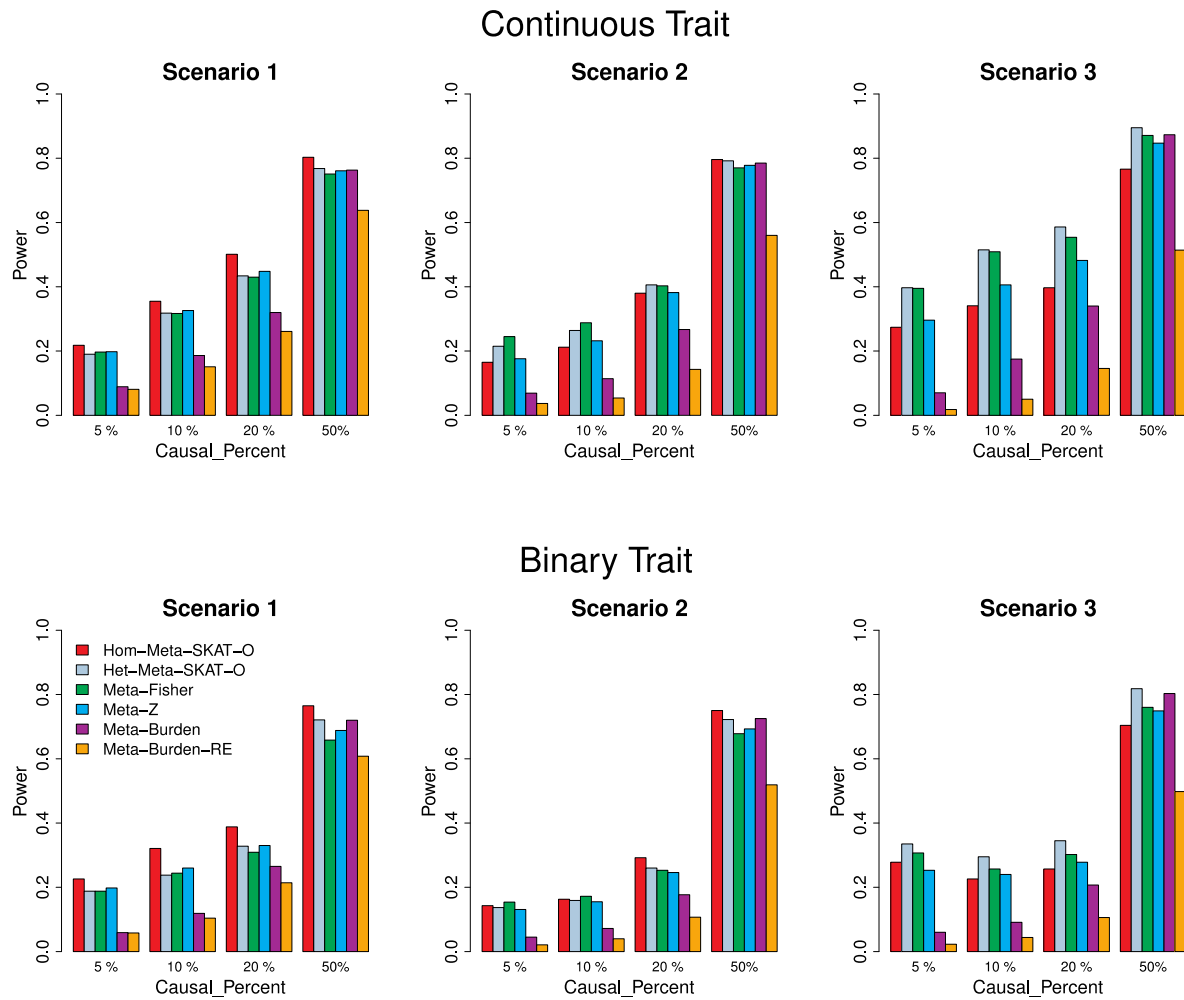

**Figure S7: Power Comparisons of Meta-Z, Meta-Burden-RE and the Other Competing Methods with Equal Study Cohorts' Sizes when All Causal Variants Were Risk-Increasing**

Empirical power at  $\alpha = 2.5 \times 10^{-6}$  with equal study cohort sizes (Table 1) when all causal variants in a region were risk-increasing. All the other settings are the same as those in Figure 2 and 3 (main text). The power estimates of all methods except Meta-Z and Meta-Burden-RE are the exactly same as the estimates in Figure 2.

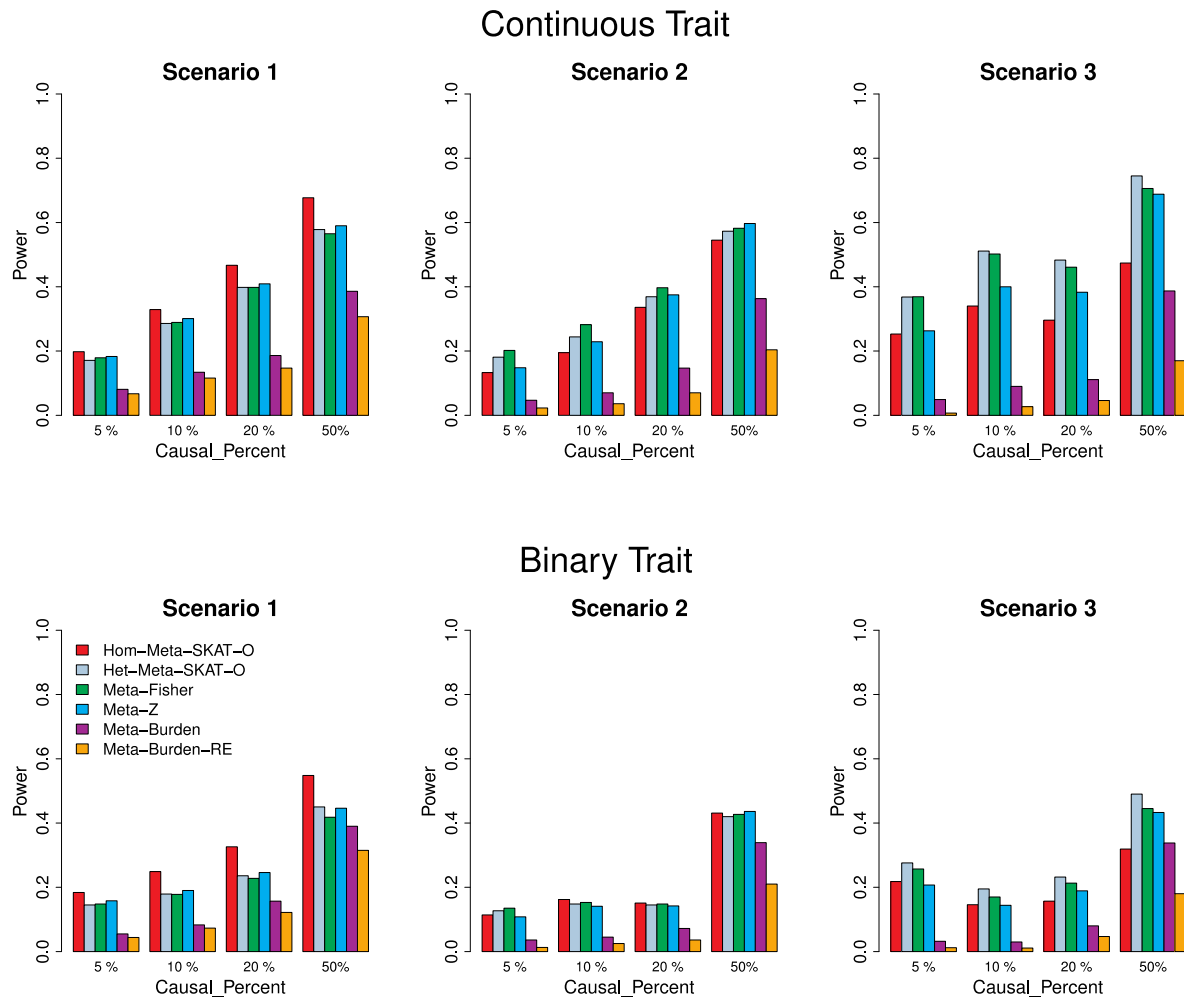

**Figure S8: Power Comparisons of Meta-Z, Meta-Burden-RE and the Other Competing Methods with Equal Study Cohorts' Sizes when 20%/80% of Causal Variants Were Risk-Reducing/Risk-Increasing**  
 Empirical power at  $\alpha = 2.5 \times 10^{-6}$  with equal study cohort sizes (Table 1) assuming 20% of the causal variants were risk-decreasing and 80% of the causal variants were risk-increasing. All the other settings are the same as those in Figure 2 and 3 (main text). The power estimates of all methods except Meta-Z and Meta-Burden-RE are the exactly same as the estimates in Figure 3.

**Table S1: Observed number of variants and sum of risk & protective allele frequencies in the power simulations.**

Each entry represents an average number of observed variants and allele frequencies over 1000 simulated datasets.

| Scenario                 | % of Causal Variants | % of Protective Variants | Number of Observed Variants | Sum of Risk allele Freq. | Sum of Protective allele Freq. |
|--------------------------|----------------------|--------------------------|-----------------------------|--------------------------|--------------------------------|
| <b>Continuous Traits</b> |                      |                          |                             |                          |                                |
| Scenario 1               | 5 %                  | 0 %                      | 42.49                       | 0.0039                   | 0                              |
|                          |                      | 20 %                     | 42.2                        | 0.0025                   | 0.0008                         |
|                          | 10 %                 | 0 %                      | 42.75                       | 0.0079                   | 0                              |
|                          |                      | 20 %                     | 42.35                       | 0.006                    | 0.0014                         |
|                          | 20 %                 | 0 %                      | 42                          | 0.0177                   | 0                              |
| 20 %                     |                      | 42.27                    | 0.0137                      | 0.0035                   |                                |
| Scenario 2               | 5 %                  | 0 %                      | 42.34                       | 0.0436                   | 0                              |
|                          |                      | 20 %                     | 42.58                       | 0.0352                   | 0.0089                         |
|                          | 10 %                 | 0 %                      | 42.4                        | 0.0036                   | 0                              |
|                          |                      | 20 %                     | 42.26                       | 0.0027                   | 0.0005                         |
|                          | 20 %                 | 0 %                      | 42.53                       | 0.0064                   | 0                              |
| 20 %                     |                      | 42.51                    | 0.0051                      | 0.0016                   |                                |
| Scenario 3               | 5 %                  | 0 %                      | 42.52                       | 0.0162                   | 0                              |
|                          |                      | 20 %                     | 42.6                        | 0.0131                   | 0.0037                         |
|                          | 10 %                 | 0 %                      | 42.26                       | 0.0427                   | 0                              |
|                          |                      | 20 %                     | 42.61                       | 0.0343                   | 0.008                          |
|                          | 20 %                 | 0 %                      | 44.58                       | 0.0052                   | 0                              |
| 20 %                     |                      | 44.53                    | 0.0041                      | 0.001                    |                                |
| <b>Binary Traits</b>     |                      |                          |                             |                          |                                |
| Scenario 1               | 5 %                  | 0 %                      | 44.41                       | 0.0094                   | 0                              |
|                          |                      | 20 %                     | 44.29                       | 0.0076                   | 0.0018                         |
|                          | 10 %                 | 0 %                      | 44.48                       | 0.0186                   | 0                              |
|                          |                      | 20 %                     | 43.97                       | 0.0143                   | 0.0036                         |
|                          | 20 %                 | 0 %                      | 44.46                       | 0.0444                   | 0                              |
| 20 %                     |                      | 44.61                    | 0.0343                      | 0.008                    |                                |
| Scenario 2               | 5 %                  | 0 %                      | 44.58                       | 0.0052                   | 0                              |
|                          |                      | 20 %                     | 44.53                       | 0.0041                   | 0.001                          |
|                          | 10 %                 | 0 %                      | 44.41                       | 0.0094                   | 0                              |
|                          |                      | 20 %                     | 44.29                       | 0.0076                   | 0.0018                         |
|                          | 20 %                 | 0 %                      | 44.48                       | 0.0186                   | 0                              |
| 20 %                     |                      | 43.97                    | 0.0143                      | 0.0036                   |                                |
| Scenario 3               | 5 %                  | 0 %                      | 44.46                       | 0.0444                   | 0                              |
|                          |                      | 20 %                     | 44.61                       | 0.0343                   | 0.008                          |
|                          | 10 %                 | 0 %                      | 43.06                       | 0.0082                   | 0                              |
|                          |                      | 20 %                     | 42.83                       | 0.0069                   | 0.0005                         |
|                          | 20 %                 | 0 %                      | 43.12                       | 0.0151                   | 0                              |
| 20 %                     |                      | 43.09                    | 0.0118                      | 0.0009                   |                                |
| Scenario 2               | 5 %                  | 0 %                      | 43.63                       | 0.0284                   | 0                              |
|                          |                      | 20 %                     | 43.65                       | 0.0223                   | 0.0024                         |
|                          | 10 %                 | 0 %                      | 45.85                       | 0.0696                   | 0                              |
|                          |                      | 20 %                     | 44.38                       | 0.053                    | 0.0071                         |
|                          | 20 %                 | 0 %                      | 42.56                       | 0.0076                   | 0                              |
| 20 %                     |                      | 42.8                     | 0.0062                      | 0.0004                   |                                |
| Scenario 3               | 5 %                  | 0 %                      | 43.24                       | 0.0132                   | 0                              |
|                          |                      | 20 %                     | 42.63                       | 0.0109                   | 0.0009                         |
|                          | 10 %                 | 0 %                      | 43.75                       | 0.0262                   | 0                              |
|                          |                      | 20 %                     | 43.39                       | 0.0198                   | 0.0025                         |
|                          | 20 %                 | 0 %                      | 45.63                       | 0.0673                   | 0                              |
| 20 %                     |                      | 44.66                    | 0.0509                      | 0.0072                   |                                |
| Scenario 1               | 5 %                  | 0 %                      | 45.06                       | 0.0127                   | 0                              |
|                          |                      | 20 %                     | 45.13                       | 0.0101                   | 0.0006                         |
|                          | 10 %                 | 0 %                      | 45.74                       | 0.0177                   | 0                              |
|                          |                      | 20 %                     | 45.06                       | 0.0139                   | 0.0012                         |
|                          | 20 %                 | 0 %                      | 46.26                       | 0.0297                   | 0                              |
| 20 %                     |                      | 45.61                    | 0.0232                      | 0.0027                   |                                |
| 50 %                     | 0 %                  | 47.9                     | 0.0642                      | 0                        |                                |
|                          | 20 %                 | 46.84                    | 0.0509                      | 0.0072                   |                                |

**Table S2. Annotation information and single variant meta-analysis results of the seven SNVs in *LPL***

| Chr    | Position | Function                | MAF                  | HDL                  |                      | LDL                  |                      | TG                   |                      |
|--------|----------|-------------------------|----------------------|----------------------|----------------------|----------------------|----------------------|----------------------|----------------------|
|        |          |                         |                      | Fisher               | IVW                  | Fisher               | IVW                  | Fisher               | IVW                  |
| 8      | 19840949 | 5UTR                    | $7.3 \times 10^{-3}$ | $5.6 \times 10^{-1}$ | $5.8 \times 10^{-1}$ | $5.1 \times 10^{-2}$ | $7.5 \times 10^{-1}$ | $3.2 \times 10^{-1}$ | $5.3 \times 10^{-1}$ |
| 8      | 19840951 | 5UTR                    | $6.5 \times 10^{-3}$ | $4.1 \times 10^{-2}$ | $1.3 \times 10^{-2}$ | $9.9 \times 10^{-1}$ | $5.6 \times 10^{-1}$ | $1.3 \times 10^{-4}$ | $6.3 \times 10^{-3}$ |
| 8      | 19849988 | Coding (non-synonymous) | $6.1 \times 10^{-3}$ | $5.0 \times 10^{-2}$ | $2.1 \times 10^{-2}$ | $9.8 \times 10^{-1}$ | $8.8 \times 10^{-1}$ | $2.6 \times 10^{-4}$ | $5.2 \times 10^{-3}$ |
| 8      | 19853715 | Coding (synonymous)     | $2.6 \times 10^{-2}$ | $7.2 \times 10^{-1}$ | $2.0 \times 10^{-1}$ | $5.6 \times 10^{-1}$ | $7.9 \times 10^{-1}$ | $5.7 \times 10^{-1}$ | $1.7 \times 10^{-1}$ |
| 8      | 19867130 | 3UTR                    | $3.9 \times 10^{-4}$ | $3.2 \times 10^{-1}$ | $1.7 \times 10^{-1}$ | $4.1 \times 10^{-1}$ | $1.6 \times 10^{-1}$ | $1.5 \times 10^{-1}$ | $7.6 \times 10^{-1}$ |
| 8      | 19867472 | 3UTR                    | $1.9 \times 10^{-2}$ | $5.5 \times 10^{-3}$ | $4.7 \times 10^{-2}$ | $1.4 \times 10^{-1}$ | $3.3 \times 10^{-1}$ | $3.2 \times 10^{-3}$ | $1.6 \times 10^{-2}$ |
| 8      | 19868517 | 3UTR                    | $1.8 \times 10^{-4}$ | $3.9 \times 10^{-1}$ | $4.1 \times 10^{-1}$ | $6.1 \times 10^{-2}$ | $1.3 \times 10^{-1}$ | $7.6 \times 10^{-1}$ | $6.8 \times 10^{-1}$ |
| Min-P  |          |                         |                      | $5.5 \times 10^{-3}$ | $1.3 \times 10^{-2}$ | $5.1 \times 10^{-2}$ | $1.3 \times 10^{-1}$ | $1.3 \times 10^{-4}$ | $5.2 \times 10^{-3}$ |
| Min-P* |          |                         |                      | $3.8 \times 10^{-2}$ | $8.8 \times 10^{-2}$ | $3.6 \times 10^{-1}$ | > 0.5                | $9.0 \times 10^{-3}$ | $3.6 \times 10^{-2}$ |

SNV annotations were conducted using hg18 (NCBI build 36) assembly. “Fisher” represents p-values from the Fisher's inverse chi-square method and “IVW” represents p-values from the inverse variance weighting method. “Min-P” represents the minimum p-value over the seven SNV p-values, and “Min-P\*” represents the multiple test adjusted minimum p-value
